# Supplementary material
Source: HighWire-hosted journal article supplement (https://www.cmajopen.ca/highwire/filestream/84475/field_highwire_adjunct_files/1/2020-0076-2-at.pdf)
Supplement: 2020-0076-2-at.pdf [file 2020-0076-2-at.pdf]

**Appendix 2 (as supplied by the authors):** Diagnostic codes, procedures and, medical services received by patients prior to opioid initiation

| Medical events prior to opioid initiation                                               |                                      | Code                                                                                                                                                                                                                                                                                       |
|-----------------------------------------------------------------------------------------|--------------------------------------|--------------------------------------------------------------------------------------------------------------------------------------------------------------------------------------------------------------------------------------------------------------------------------------------|
| Accident, fracture or surgery                                                           | Surgery                              | Procedure code : 05004; 05054; 05067; 05100; 05101; 05168; 05201; 05203; 05208; 05209; 05455; 05459; 05460; 05462; 05469; 05471; 05900-05918; 05920-05925; 05928-05980; 05987-05998; 06912; 06913; 06946<br>Or ICD-9 code <sup>1</sup> : 540.x – 543.x 550.x – 553.x; 669.7; 722.0 – 722.2 |
|                                                                                         | Accident                             | ICD-9 code 851 to 959.9 with a service location in an emergency department (institution code: CH35)                                                                                                                                                                                        |
|                                                                                         | Fracture                             | ICD-9 code 800 to 848.9 with a service location in an emergency department (institution code: CH35)                                                                                                                                                                                        |
| Diagnosis associated with chronic pain                                                  | Arthritis                            | ICD-9 : 714 – 715.9                                                                                                                                                                                                                                                                        |
|                                                                                         | Spinal stenosis                      | ICD-9 : 724.x                                                                                                                                                                                                                                                                              |
|                                                                                         | Fibromyalgia                         | ICD-9 : 729.1                                                                                                                                                                                                                                                                              |
|                                                                                         | Osteoporosis                         | ICD-9 : 733.0                                                                                                                                                                                                                                                                              |
|                                                                                         | Spine deformation                    | ICD-9 737.x                                                                                                                                                                                                                                                                                |
|                                                                                         | Neuropathy                           | ICD-9 : 053.1; 356.x; 357.2                                                                                                                                                                                                                                                                |
|                                                                                         | Limb pain                            | ICD-9 : 353.6; 729.5                                                                                                                                                                                                                                                                       |
|                                                                                         | Neck pain                            | ICD-9 : 723.1                                                                                                                                                                                                                                                                              |
| Other type of pain                                                                      | Abdominal pain                       | ICD-9 : 789.0                                                                                                                                                                                                                                                                              |
|                                                                                         | Thoracic pain                        | ICD-9 : 786.5                                                                                                                                                                                                                                                                              |
|                                                                                         | Abscess                              | ICD-9 : 682.x                                                                                                                                                                                                                                                                              |
|                                                                                         | Tendon pain                          | ICD-9 : 726.x                                                                                                                                                                                                                                                                              |
|                                                                                         | Pain related to the digestive system | ICD-9 : 562.x; 574.x – 575.1; 576.5; 577.0; 592.x; 788.0                                                                                                                                                                                                                                   |
| Hospitalization or ED visit without any diagnosis associated with acute or chronic pain |                                      | Billing with a location of service in the hospital or ED in the 7 days prior to opioid initiation                                                                                                                                                                                          |

**Reference**

1. World Health Organization. (1978). International classification of diseases : [9th] ninth revision, basic tabulation list with alphabetic index. World Health Organization. <https://apps.who.int/iris/handle/10665/39473> (accessed 07 August 2020)
